# Supplementary material for: Advantages of Bimetallic Organic Frameworks in the Adsorption, Catalysis and Detection for Water Contaminants
Source: MDPI journal article supplement (doi:10.3390/nano13152194), 2023-07-28
Supplement: s1 [file s1]

## Supporting Information

for

### **Advantages of bimetallic organic frameworks in the adsorption, catalysis and detection for water contaminants**

Jun Luo<sup>a</sup>, Xiao Luo<sup>a</sup>, Yonghai Gan<sup>a</sup>, Xiaoming Xu<sup>b</sup>, Bin Xu<sup>a</sup>, Zhuang Liu<sup>a</sup>, Chengcheng Ding<sup>a, \*</sup>, Yibin Cui<sup>a, \*</sup> and Cheng Sun<sup>a, c, \*</sup>

<sup>a</sup> *Nanjing Institute of Environmental Sciences, Ministry of Ecology and Environment of the People's Republic of China, Nanjing 210042, PR China*

<sup>b</sup> *Department of Chemistry, Tsinghua University, Beijing, 100084, PR China*

<sup>c</sup> *State Key Laboratory of Pollution Control and Resource Reuse, School of the Environment, Nanjing University, Nanjing 210023, PR China*

\* Corresponding author.

*E-mail addresses:* [dcc@nies.org](mailto:dcc@nies.org) (C. Ding), [cyb@nies.org](mailto:cyb@nies.org) (Y. Cui), [envidean@nju.edu.cn](mailto:envidean@nju.edu.cn), [philasun@126.com](mailto:philasun@126.com) (C. Sun)

## SI. Figures

**Figure S1.** (a) Schematic of the synthesis mechanism of bimetallic CoNi-MOFs. Reproduced with permission from ref. [1]. Copyright 2021, Elsevier. (b) Schematic drawing of the NiZn-MOFs nanostructure. Reproduced with permission from ref. [2]. Copyright 2022, Elsevier.

**Figure S2.** (a) Diagrammatic synthesis of CoMo-MI-T. Reproduced with permission from ref. [3]. Copyright 2021, Elsevier. (b) CoNi@C is synthesized via a one-pot solvothermal and pyrolysis reaction. Reproduced with permission from ref. [4]. Copyright 2022, Elsevier. (c) Preparation procedure of CoCe-MOF. Reproduced with permission from ref. [5]. Copyright 2022, Elsevier.

**Figure S3.** The schematic diagram of the preparation process for CoFe<sub>2</sub>O<sub>4</sub> NC and the catalytic degradation of BPA by activating PMS and (b) removal efficiency of BPA in different reaction systems within 60 min. Reproduced with permission from ref. [6]. Copyright 2018, Elsevier. Effect of (c) Nb/Co ratio (catalyst = 0.01 g; TC = 100 mL, 0.02 g/L; PMS = 0.3 g/L; pH = 6.02; temperature = 25 °C; the dotted line represents the instability of Co-MOF), (d) Cl<sup>-</sup>, (e) NO<sub>3</sub><sup>-</sup>, (f) HCO<sub>3</sub><sup>-</sup> and (g) C<sub>2</sub>O<sub>4</sub><sup>2-</sup> on TC removal by NbCo-MOF (Nb:Co=1:4). Reproduced with permission from ref. [7]. Copyright 2022, Elsevier.

**Figure S4.** (a) UV-vis DRS spectra and (b) the band gap energy of as-prepared samples. Reproduced with permission from ref. [8]. Copyright 2022, Elsevier. (c) The process of preparation for ZnTi-MOF and photocatalytic degradation of basic Rhodamine. Reproduced with permission from ref. [9]. Copyright 2021, Elsevier.

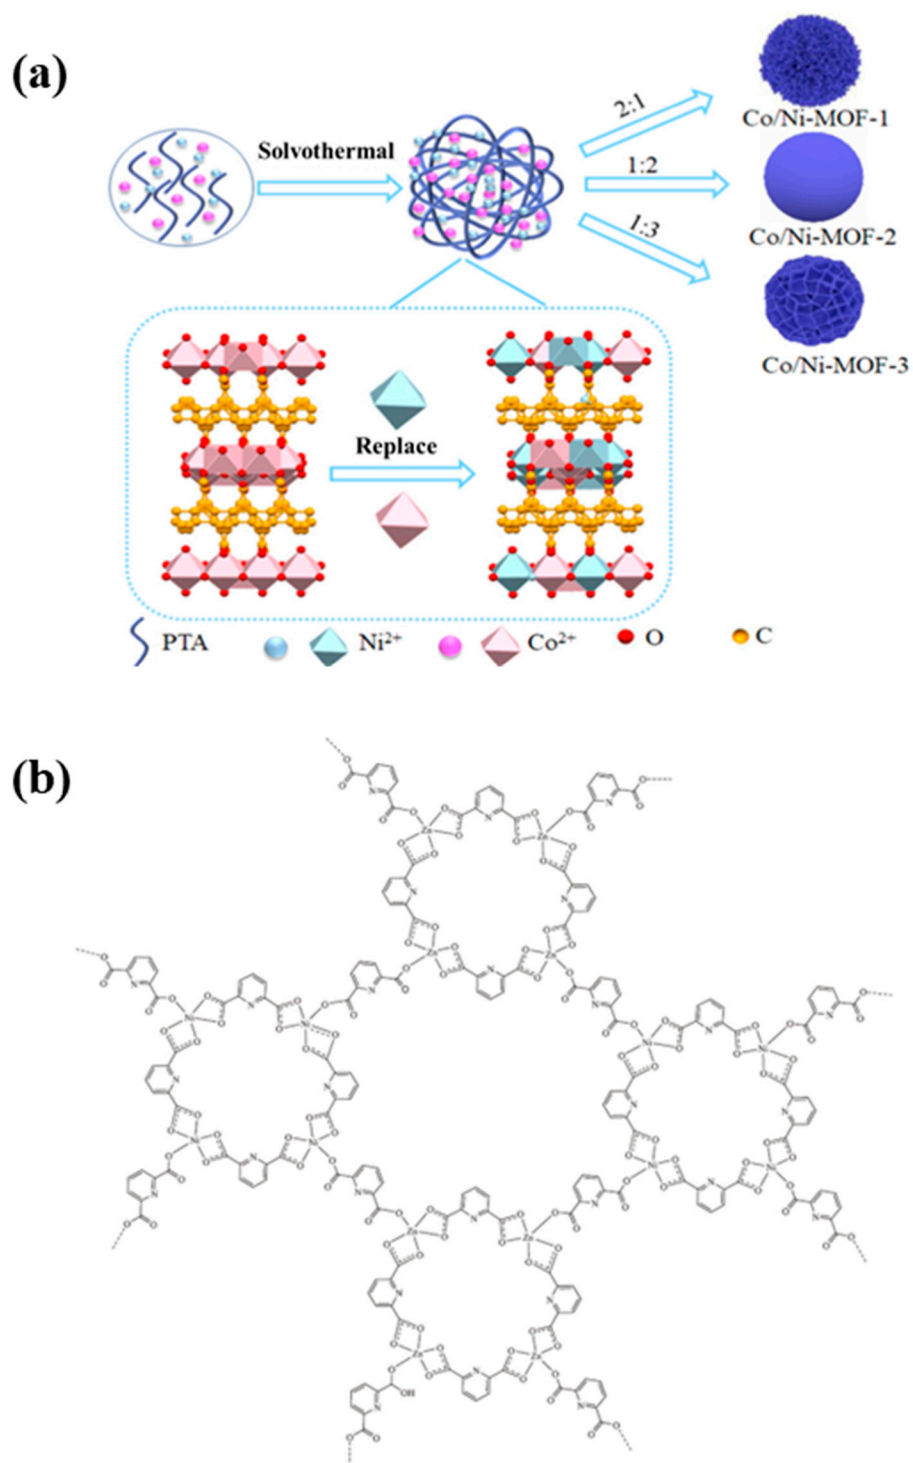

**Figure S1.** (a) Schematic of the synthesis mechanism of bimetallic CoNi-MOFs. Reproduced with permission from ref. [1]. Copyright 2021, Elsevier. (b) Schematic drawing of the NiZn-MOFs nanostructure. Reproduced with permission from ref. [2]. Copyright 2022, Elsevier.

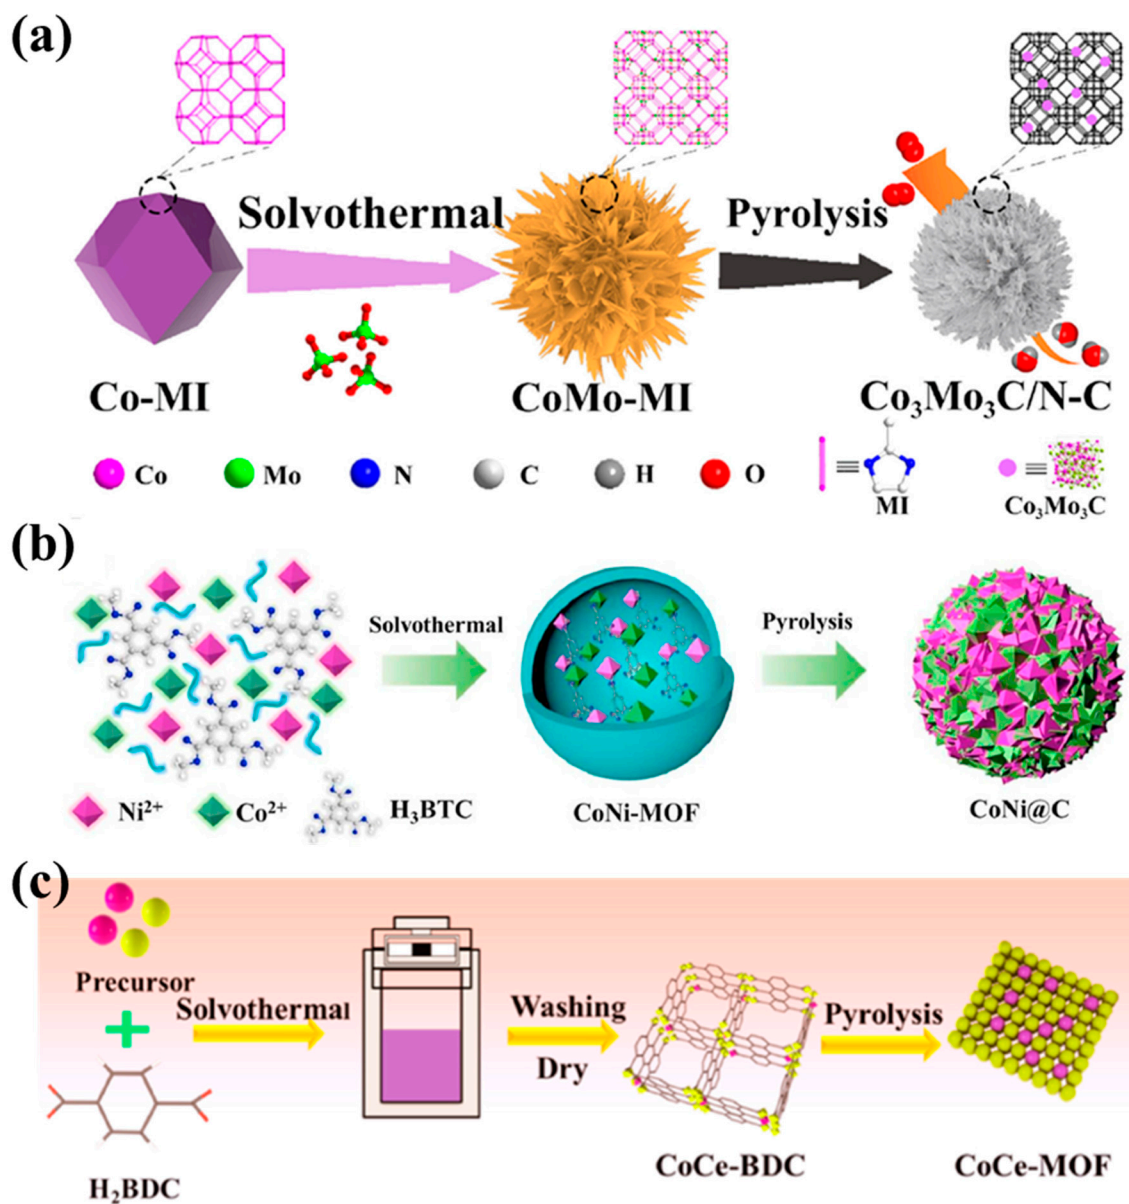

**Figure S2.** (a) Diagrammatic synthesis of CoMo-MI-T. Reproduced with permission from ref. [3]. Copyright 2021, Elsevier. (b) CoNi@C is synthesized via a one-pot solvothermal and pyrolysis reaction. Reproduced with permission from ref. [4]. Copyright 2022, Elsevier. (c) Preparation procedure of CoCe-MOF. Reproduced with permission from ref. [5]. Copyright 2022, Elsevier.

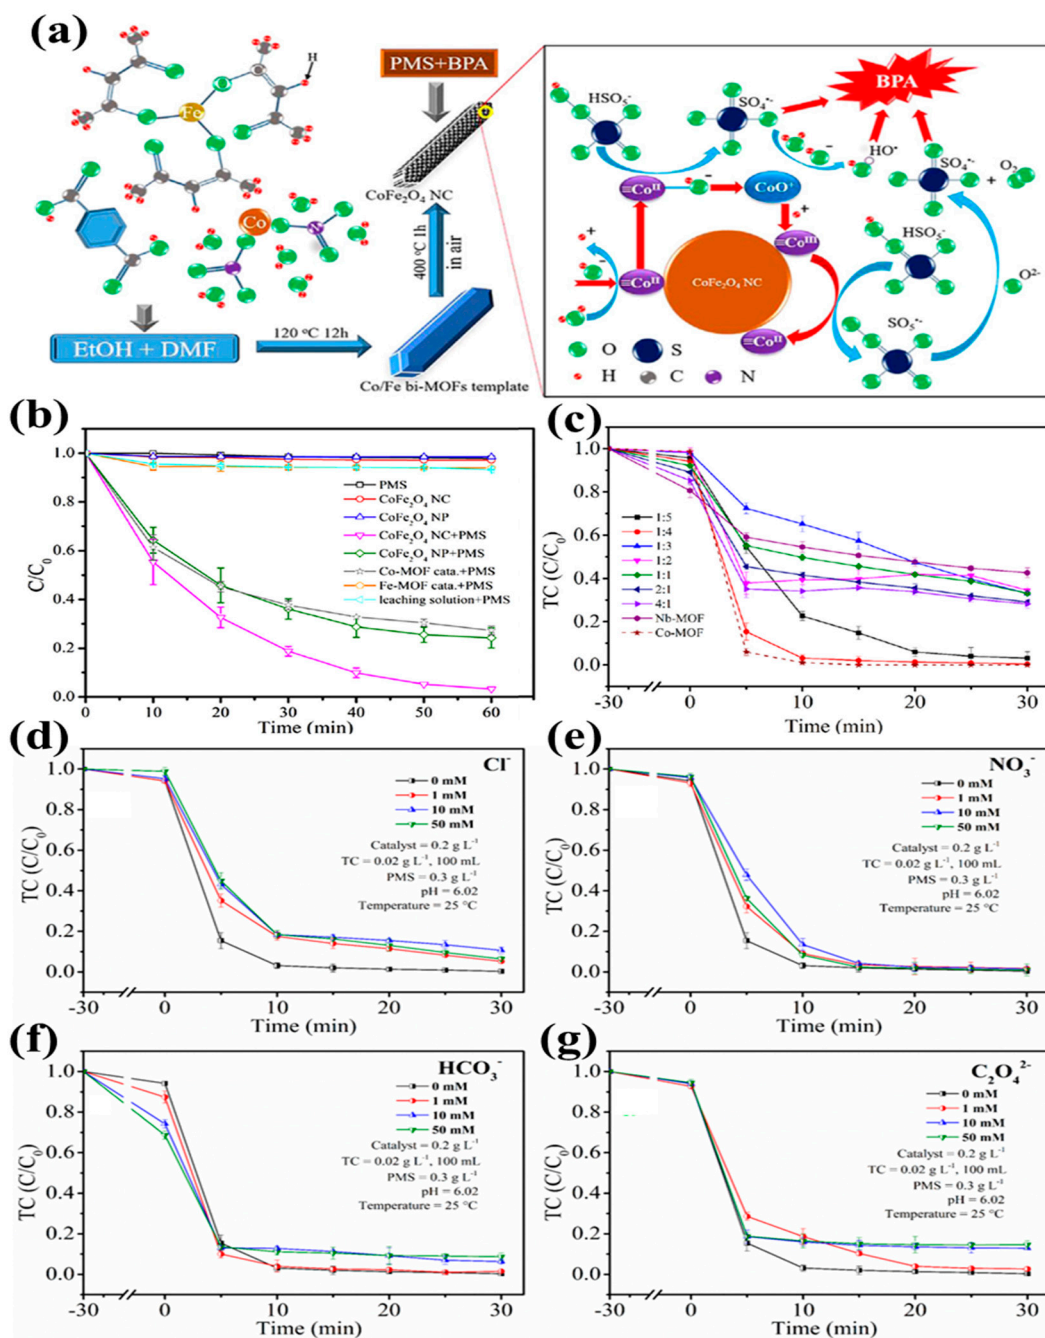

**Figure S3.** The schematic diagram of the preparation process for CoFe<sub>2</sub>O<sub>4</sub> NC and the catalytic degradation of BPA by activating PMS and (b) removal efficiency of BPA in different reaction systems within 60 min. Reproduced with permission from ref. [6]. Copyright 2018, Elsevier.

Effect of (c) Nb/Co ratio (catalyst = 0.01 g; TC = 100 mL, 0.02 g/L; PMS = 0.3 g/L; pH = 6.02; temperature = 25 °C; the dotted line represents the instability of Co-MOF), (d)  $\text{Cl}^-$ , (e)  $\text{NO}_3^-$ , (f)  $\text{HCO}_3^-$  and (g)  $\text{C}_2\text{O}_4^{2-}$  on TC removal by NbCo-MOF (Nb:Co=1:4). Reproduced with permission from ref. [7]. Copyright 2022, Elsevier.

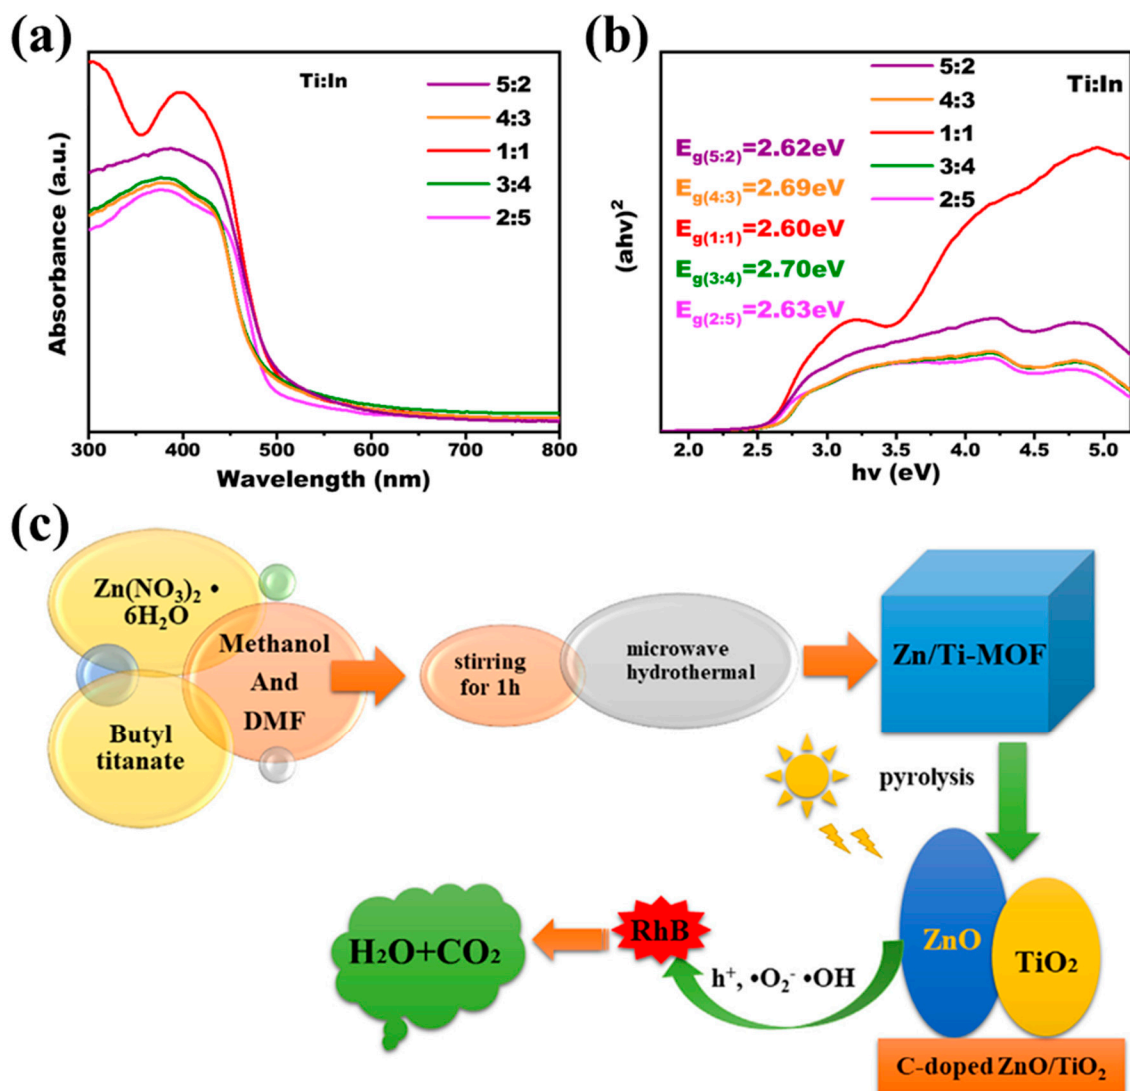

**Figure S4.** (a) UV–vis DRS spectra and (b) the band gap energy of as-prepared samples.

Reproduced with permission from ref. [8]. Copyright 2022, Elsevier. (c) The process of preparation for ZnTi-MOF and photocatalytic degradation of basic Rhodamine. Reproduced with permission from ref. [9]. Copyright 2021, Elsevier.

## References

- [1] H. Chen, Y. Huo, K. Cai, Y. Teng, Controllable preparation and capacitance performance of bimetal Co/Ni-MOF, *Synthetic Met.*, 276 (2021) 116761. <https://doi.org/10.1016/j.synthmet.2021.116761>.
- [2] W. Suksatan, P. Kazemzadeh, D. Afzali, M. Moghaddam-manesh, N.P.S. Chauhan, G. Sargazi, A controllable study on ultrasound assisted synthesis of a novel Ni/Zn based hybrid MOF nanostructures for *Dextranase* immobilization, *Inorg. Chem. Commun.*, 139 (2022) 109410. <https://doi.org/10.1016/j.inoche.2022.109410>.
- [3] Y. Guo, Q. Huang, J. Ding, L. Zhong, T.-T. Li, J. Pan, Y. Hu, J. Qian, S. Huang, CoMo carbide/nitride from bimetallic MOF precursors for enhanced OER performance, *Int. J. Hydrogen Energy*, 46 (2021) 22268-22276. <https://doi.org/10.1016/j.ijhydene.2021.04.084>.
- [4] C. Liang, J. He, Y. Zhang, W. Zhang, C. Liu, X. Ma, Y. Liu, J. Gu, MOF-derived CoNi@C-silver nanowires/cellulose nanofiber composite papers with excellent thermal management capability for outstanding electromagnetic interference shielding, *Compos. Sci. Technol.*, 224 (2022) 109445. <https://doi.org/10.1016/j.compscitech.2022.109445>.
- [5] M. Wang, F. Li, J. Dong, X. Lin, X. Liu, D. Wang, W. Cai, MOF-derived CoCeO<sub>x</sub> nanocomposite catalyst with enhanced anti-coking property for ethanol reforming with CO<sub>2</sub>, *J. Environ. Chem. Eng.*, 10 (2022) 107892. <https://doi.org/10.1016/j.jece.2022.107892>.
- [6] S. Yang, X. Qiu, P. Jin, M. Dzakpasu, X.C. Wang, Q. Zhang, L. Zhang, L. Yang, D. Ding, W. Wang, K. Wu, MOF-templated synthesis of CoFe<sub>2</sub>O<sub>4</sub> nanocrystals and its coupling with peroxymonosulfate for degradation of bisphenol A, *Chem. Eng. J.*, 353 (2018) 329-339. <https://doi.org/10.1016/j.cej.2018.07.105>.
- [7] Z. Li, S. Ning, H. Zhu, X. Wang, X. Yin, T. Fujita, Y. Wei, Novel NbCo-MOF as an advanced peroxymonosulfate catalyst for organic pollutants removal: growth, performance and mechanism study, *Chemosphere*, 288 (2022) 132600. <https://doi.org/10.1016/j.chemosphere.2021.132600>.
- [8] M. Li, J. Yuan, G. Wang, L. Yang, J. Shao, H. Li, J. Lu, One-step construction of Ti-In bimetallic MOFs to improve synergistic effect of adsorption and photocatalytic degradation of bisphenol A, *Sep. Purif. Technol.*, 298 (2022) 121658. <https://doi.org/10.1016/j.seppur.2022.121658>.
- [9] Y. Wang, X. Liu, L. Guo, L. Shang, S. Ge, G. Song, N. Naik, Q. Shao, J. Lin, Z. Guo, Metal organic framework-derived C-doped ZnO/TiO<sub>2</sub> nanocomposite catalysts for enhanced photodegradation of Rhodamine B, *J. Colloid Interf. Sci.*, 599 (2021) 566-576. <https://doi.org/10.1016/j.jcis.2021.03.167>.
